# Supplementary material
Source: publisher figshare collection journal article supplement (https://tandf.figshare.com/ndownloader/files/14948411)

# Supplementary material

**Table S1.** Convective depth for Lake Onego, March 2017.

| **Date** | **Time (h)** | **Convective Depth (m)** | **Time (h)** | **Convective Depth (m)** |
| --- | --- | --- | --- | --- |
| 15 Mar  2017 | 08:00 | 12.84 | 14:00 | 12.48 |
| 16 Mar  2017 | 08:00 | 13.29 | 14:00 | 13.74 |
| 17 Mar  2017 | 08:00 | 14.04 | 14:00 | 14.04 |

**Table S2.** Vertical light attenuation coefficient (Kw) and euphotic depth (Zeu)for Lake Onego in March 2017. Values in this table correspond to the average between 08:00 - 09:00 h for the morning (AM) and 14:00 - 15:00 h for the afternoon (PM) measurements. In brackets -the standard deviation.

| **Date** | **Time** | **Kw (m-1)** | | **Zeu(m)** | |
| --- | --- | --- | --- | --- | --- |
| 15 Mar  2017 | AM | 2.73 | (0.14) | 1.69 | (0.09) |
| PM | 2.66 | (0.05) | 1.73 | (0.03) |
| 16 Mar  2017 | AM | 2.71 | (0.11) | 1.70 | (0.07) |
| PM | 2.76 | (0.02) | 1.67 | (0.01) |
| 17 Mar  2017 | AM | 2.77 | (0.12) | 1.67 | (0.07) |
| PM | 2.65 | (0.05) | 1.74 | (0.03) |
| **Total Average** | | 2.71 | (0.05) | 1.70 | (0.03) |

**Table S3.** Chemical methods for nutrient concentration quantification. Winter and Spring Lake Onego campaigns 2017.Methods based on Lozovik and Efremenko (2017).

| Characteristic | Analytical method |
| --- | --- |
| Si | Spectrophotometric determination to form a yellow silicomolybdenum heteropolyacid |
| NH4-N | Spectrophotometric indophenol method with phenol and hypochlorite, λ=630 nm |
| NO2-N | Spectrophotometric method with sulfanilamide and N-(1-Naphthyl)-ethylenediamine-dihydrochloride, λ=543 nm |
| NO3-N | Reduction to NO2- on the Cd-reductor and determine NO2- |
| Norg | Calculated as the difference between TN and sum NH4-N + NO3-N + NO2-N |
| TN | Spectrometric method with mineralization of samples in a thermostat |
| Pmin | Spectrophotometric method with ammonium molybdate and ascorbinic acid reduce phosphatomolybdic heteropolyacid λ=882 nm |
| TP | Oxidation of organic matter by K2S2O8 in acidic media and determine Preact |

**Table S4**. Chemical analysis of nutrients for water samples taken in Lake Onego, March 2017. This data was taken at the Ice camp station (P2).

| **Station** | | **Time** | **Depth**  **(m)** | | **NO3-+NO2- (mg N L-1)** | **PO43-+Preact (μg P L-1)** | **TN**  **(mg N L-1)** | | **TP**  **(μg P L-1)** | **Si**  **(mg Si L-1)** |
| --- | --- | --- | --- | --- | --- | --- | --- | --- | --- | --- |
| 15  Mar  2017 | 08:00h | | 0 | 0.18 | | 6.0 | 0.41 | 18.0 | | 1.1 |
| 1 | 0.15 | | 8.0 | 0.44 | 18.0 | | 1.15 |
| 5 | 0.17 | | 7.0 | 0.4 | 18.0 | | 1.21 |
| 10 | 0.18 | | 7.0 | 0.44 | 19.0 | | 1.15 |
| 14:00h | | 0 | 0.18 | | 7.0 | 0.42 | 17.0 | | 1.11 |
| 1 | 0.16 | | 7.0 | 0.43 | 17.0 | | 1.15 |
| 5 | 0.19 | | 7.0 | 0.44 | 18.0 | | 1.13 |
| 10 | 0.16 | | 7.0 | 0.43 | 18.0 | | 1.14 |
| 16  Mar  2017 | 08:00h | | 0 | 0.16 | | 7.0 | 0.44 | 16.0 | | 1.14 |
| 1 | 0.14 | | 7.0 | 0.47 | 16.0 | | 1.09 |
| 5 | 0.18 | | 6.0 | 0.45 | 14.0 | | 1.13 |
| 10 | 0.14 | | 6.0 | 0.45 | 14.0 | | 1.09 |
| 14:00h | | 0 | 0.17 | | 6.0 | 0.43 | 14.0 | | 1.13 |
| 1 | 0.14 | | 9.0 | 0.42 | 10.0 | | 1.13 |
| 5 | 0.17 | | 7.0 | 0.44 | 14.0 | | 1.08 |
| 10 | 0.14 | | 6.0 | 0.43 | 16.0 | | 1.08 |
| 17  Mar  2017 | 08:00h | | 0 | 0.16 | | 5.0 | 0.43 | 16.0 | | 1.22 |
| 1 | 0.18 | | 4.0 | 0.46 | 16.0 | | 1.18 |
| 5 | 0.14 | | 5.0 | 0.44 | 15.0 | | 1.16 |
| 10 | 0.18 | | 5.0 | 0.45 | 15.0 | | 1.14 |
| 14:00h | | 0 | 0.18 | | 5.0 | 0.45 | 17.0 | | 1.15 |
| 1 | 0.19 | | 6.0 | 0.45 | 16.0 | | 1.26 |
| 5 | 0.17 | | 6.0 | 0.43 | 15.0 | | 1.19 |
| 10 | 0.19 | | 6.0 | 0.44 | 16.0 | | 1.17 |

**Table S5.** Nutrient analysis for water samples taken in Lake Onego, spring 2017. C3 corresponds to the open water station and T0708 to the inshore station.

| **Station** | **Time** | **Depth**  **(m)** | | **NO3-+NO2- (mg N L-1)** | **PO43-/Preact (μg P L-1)** | **TP**  **(μg P L-1 )** | **Si**  **(mg Si L-1)** |
| --- | --- | --- | --- | --- | --- | --- | --- |
| C3 | 08:00h | 1 | 0.17 | | 1 | 3 | 0.38 |
| 6 | 0.15 | | 1 | 3 | 0.41 |
| 13 | 0.16 | | 1 | 3 | 0.43 |
| 20 | 0.17 | | 1 | 3 | 0.39 |
| 30 | 0.15 | | 1 | 3 | 0.45 |
| 15:00h | 1 | 0.18 | | 1 | 3 | 0.46 |
| 6 | 0.16 | | 2 | 3 | 0.43 |
| 13 | 0.18 | | 1 | 3 | 0.37 |
| 20 | 0.16 | | 1 | 3 | 0.4 |
| 30 | 0.18 | | 1 | 2 | 0.41 |
| T0708 | 08:00h | 1 | 0.12 | | 0 | 6 | 0.44 |
| 5.5 | 0.14 | | 1 | 3 | 0.32 |
| 8 | 0.14 | | 1 | 4 | 0.37 |
| 11 | 0.15 | | 1 | 4 | 0.44 |
| 14 | 0.14 | | 1 | 3 | 0.28 |
| 20 | 0.1 | | 1 | 2 | 0.3 |
| 15:00h | 1 | 0.12 | | 1 | 5 | 0.58 |
| 4 | 0.04 | | 0 | 3 | 0.6 |
| 6 | 0.04 | | 0 | 5 | 0.58 |
| 9.5 | 0.1 | | 1 | 3 | 0.47 |
| 12 | 0.1 | | 0 | 3 | 0.28 |
| 20 | 0.06 | | 0 | 4 | 0.18 |

**Figure S1**

Diurnal variation in the vertical water temperature profiles (0 – 26 m) from Lake Onego in March 2017 at the Ice Camp station. Each color represents a different sampling day. The solid lines correspond to the morning sampling between 08:00 - 09:00 h and the dashed lines to the average temperature between 14:00 - 15:00 h for the afternoon (PM) measurements.

**
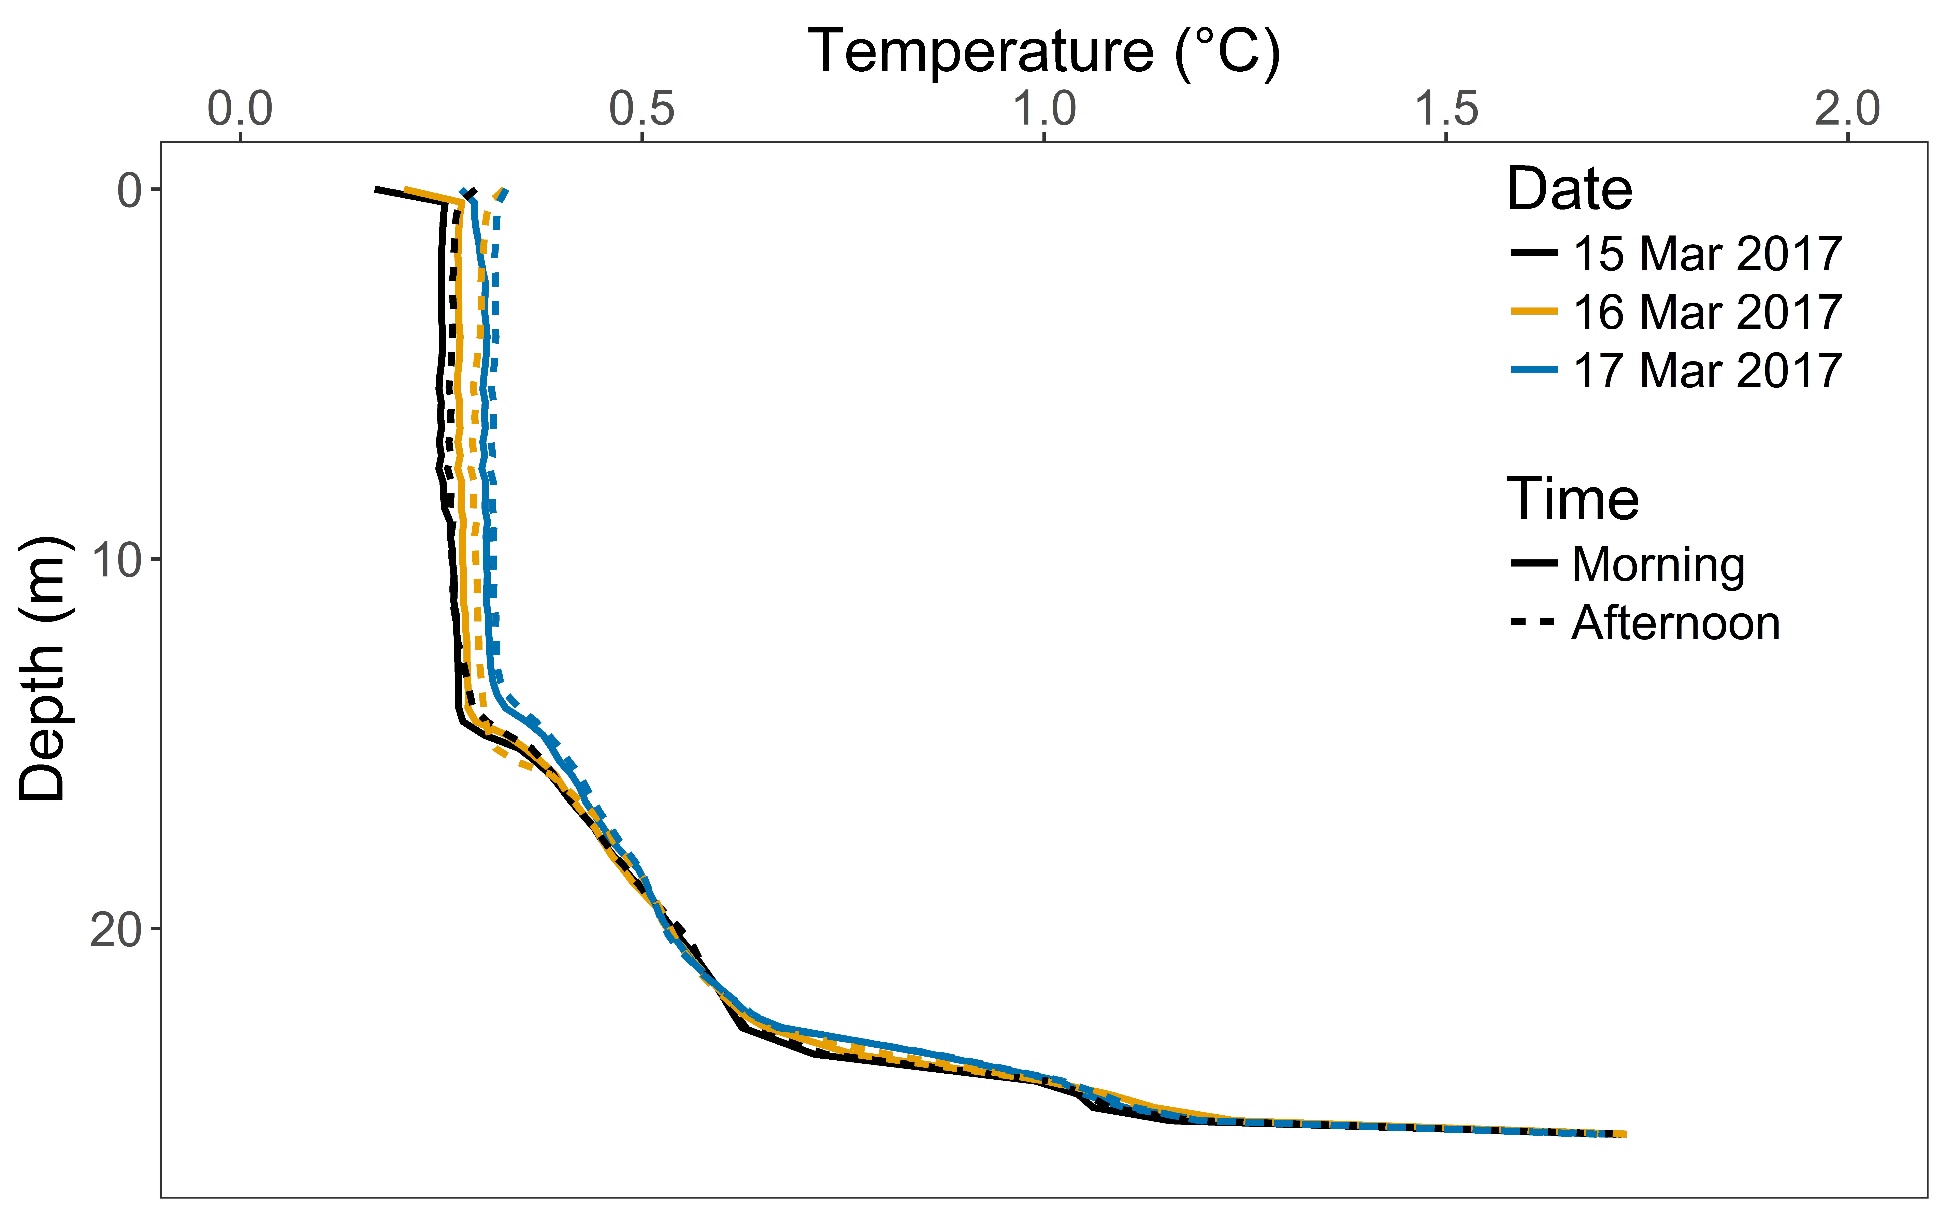
**

**Figure S2.**

The concentration of chlorophyll-a per unit area was calculated at Zeu, Zm and at the maximum sampling depth (color scale) at each site and time (line-type scale). Chlorophyll-a depth distribution shows more differences between the day, with more chlorophyll in the morning that in the afternoon in winter, the opposite for the inshore side in spring and no dial variations at the open lake side in spring.


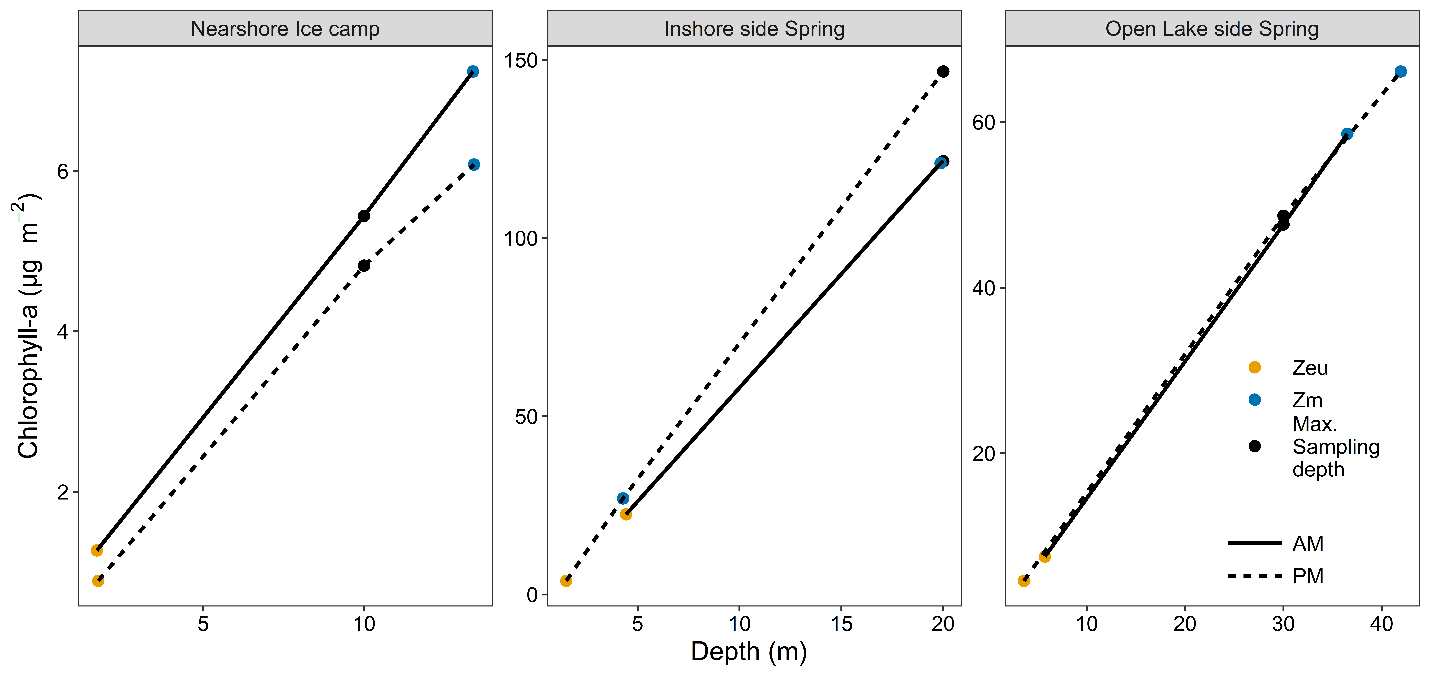

Supplement: Supplementary file 1 [file 14948411]
